# Supplementary material
Source: publisher figshare collection journal article supplement (https://springernature.figshare.com/ndownloader/files/9353959)
Supplement: Supplementary file 1 [file 9353959]

| The values of all the explanatory variables at each sampling site. | | | | | | | | | |  |  | |  | |  | |
| --- | --- | --- | --- | --- | --- | --- | --- | --- | --- | --- | --- | --- | --- | --- | --- | --- |
| Abbreviation: GF + Arch. = The Gulf of Finland and the Archipelago Sea | | | | | | |  |  | |  |  | |  | |  | |
|  |  | |  | |  | |  |  | |  |  | |  | |  | |
|  |  | |  | |  | |  | **Physicochemical variables** | | | | |  | |  | |
| **Sub-basin name** | **Sampling site number** | | **Sampling site name** | | **Water temp. (°C)** | | **pH** | **Salinity** | | **Total P (µg/l)** | **Total N (µg/l)** | | **Oxygen (mg/l)** | | **Silicon**  **(mg/l)** | |
| GF + Arch. | 1 | | Virolahti | | 22 | | 7.9 | 2.7 | | 41.6 | 491.5 | | 8.78 | | 0.26 | |
| GF + Arch. | 2 | | Hamina | | 21.7 | | 8.1 | 3.4 | | 69.0 | 461.4 | | 8.95 | | 0.05 | |
| GF + Arch. | 3 | | Pyhtää | | 22.1 | | 8.1 | 1.5 | | 23.9 | 364.1 | | 9.42 | | 0.38 | |
| GF + Arch. | 4 | | Loviisi | | 21 | | 8.3 | 4.1 | | 49.1 | 453.6 | | 11.73 | | 0.20 | |
| GF + Arch. | 5 | | Porvoo | | 21.1 | | 8.5 | 4.3 | | 59.7 | 379.0 | | 10.60 | | 0.39 | |
| GF + Arch. | 6 | | Vuosaari | | 18.4 | | 8.3 | 5.2 | | 19.9 | 383.1 | | 11.79 | | 0.36 | |
| GF + Arch. | 7 | | Porkkala | | 20.8 | | 8.3 | 5.5 | | 131.0 | 365.5 | | 10.61 | | 0.18 | |
| GF + Arch. | 8 | | Snappertuna | | 22.3 | | 7.9 | 5.1 | | 64.5 | 353.1 | | 11.37 | | 0.57 | |
| GF + Arch. | 9 | | Hanko | | 21.7 | | 8.2 | 5.5 | | 69.1 | 449.8 | | 11.25 | | 0.83 | |
| GF + Arch. | 10 | | Förby | | 21 | | 8.2 | 5.0 | | 46.3 | 408.0 | | 12.63 | | 0.33 | |
| GF + Arch. | 11 | | Karuna | | 22.3 | | 8.2 | 4.4 | | 58.8 | 360.3 | | 9.26 | | 0.53 | |
| GF + Arch. | 12 | | Rymättylä | | 21 | | 7.9 | 5.2 | | 64.9 | 419.2 | | 10.04 | | 0.81 | |
| GF + Arch. | 13 | | Kustavi | | 17.8 | | 8.1 | 6.1 | | 94.2 | 325.4 | | 10.49 | | 0.60 | |
| Bothnian Sea | 14 | | Uusikaupunki | | 21 | | 8.0 | 3.5 | | 52.1 | 467.3 | | 9.52 | | 0.44 | |
| Bothnian Sea | 15 | | Rauma | | 19.7 | | 7.9 | 5.2 | | 62.7 | 308.7 | | 9.68 | | 0.49 | |
| Bothnian Sea | 16 | | Luvia | | 21.1 | | 7.9 | 5.4 | | 75.6 | 255.8 | | 11.62 | | 1.30 | |
| Bothnian Sea | 17 | | Reposaari | | 18.7 | | 7.7 | 1.7 | | 29.5 | 696.5 | | 10.27 | | 0.99 | |
| Bothnian Sea | 18 | | Merikarvia | | 19 | | 6.4 | 5.5 | | 57.5 | 758.4 | | 6.41 | | 0.77 | |
| Bothnian Sea | 19 | | Kristiinankaup. | | 18.7 | | 8.0 | 4.7 | | 55.1 | 265.4 | | 9.50 | | 0.69 | |
| Bothnian Sea | 20 | | Närpiö | | 18.3 | | 8.1 | 5.7 | | 60.8 | 349.0 | | 9.74 | | 0.86 | |
| Bothnian Sea | 21 | | Korsnäs | | 18.3 | | 8.0 | 5.7 | | 80.0 | 547.2 | | 9.67 | | 0.39 | |
| Bothnian Sea | 22 | | Långskäret | | 19.4 | | 8.0 | 3.5 | | 35.6 | 1429.2 | | 10.17 | | 0.72 | |
| Bothnian Sea | 23 | | Iskmo | | 18.5 | | 8.0 | 4.4 | | 34.3 | 334.5 | | 11.50 | | 0.86 | |
| Bothnian Bay | 24 | | Oravainen | | 19.9 | | 7.6 | 3.2 | | 54.1 | 730.4 | | 9.78 | | 1.46 | |
| Bothnian Bay | 25 | | Uusikaarlepyy | | 20.1 | | 7.6 | 1.6 | | 38.0 | 544.9 | | 9.88 | | 1.47 | |
| Bothnian Bay | 26 | | Luoto | | 22 | | 7.1 | 1.2 | | 20.7 | 805.9 | | 10.32 | | 1.42 | |
| Bothnian Bay | 27 | | Kokkola | | 20.3 | | 7.6 | 2.1 | | 31.0 | 440.1 | | 10.86 | | 1.25 | |
| Bothnian Bay | 28 | | Kalajoki | | 18.8 | | 7.7 | 3.0 | | 50.6 | 381.8 | | 10.46 | | 1.23 | |
| Bothnian Bay | 29 | | Yppäri/Pyhäjoki | | 17.6 | | 7.4 | 2.6 | | 27.9 | 396.8 | | 10.09 | | 3.20 | |
| Bothnian Bay | 30 | | Raahe | | 18.4 | | 7.9 | 2.6 | | 18.5 | 362.7 | | 10.68 | | 0.72 | |
| Bothnian Bay | 31 | | Siikajoki | | 17.7 | | 7.5 | 2.2 | | 21.3 | 401.4 | | 10.71 | | 1.75 | |
| Bothnian Bay | 32 | | Oulunsalo | | 16.3 | | 7.4 | 1.7 | | 28.0 | 379.4 | | 10.31 | | 2.13 | |
| Bothnian Bay | 33 | | Haukipudas | | 19.1 | | 7.5 | 1.8 | | 33.7 | 427.0 | | 11.30 | | 2.62 | |
| Bothnian Bay | 34 | | Ii/Ojakylä | | 19.3 | | 7.2 | 1.2 | | 91.1 | 427.8 | | 10.65 | | 4.07 | |
| Bothnian Bay | 35 | | Ii/Kuivaniemi | | 18.3 | | 6.6 | 1.7 | | 13.7 | 346.0 | | 9.24 | | 8.91 | |
| Bothnian Bay | 36 | | Simo | | 16.3 | | 7.2 | 2.3 | | 26.6 | 381.3 | | 10.47 | | 2.30 | |
| Bothnian Bay | 37 | | Kemi | | 18.3 | | 7.1 | 0.1 | | 34.2 | 483.3 | | 8.93 | | 3.21 | |
|  |  |  | | **Climatic variables** | | | | | **Spatial variables** | | | | |  | |
| **Sub-basin name** | **Sampling site number** | **Sampling site name** | | **Air temp. (°C)** | | **Precipit. (mm/month)** | | | **Longitude** | | | **Latitude** | | **Exposition (index)** | |
| GF + Arch. | 1 | Virolahti | | 17.3 | | 58.5 | | | 3541 | | | 6719 | | 2767.7 | |
| GF + Arch. | 2 | Hamina | | 17.6 | | 59.3 | | | 3511 | | | 6717 | | 1837.4 | |
| GF + Arch. | 3 | Pyhtää | | 17.5 | | 59.1 | | | 3481 | | | 6702 | | 0.1 | |
| GF + Arch. | 4 | Loviisi | | 17.3 | | 62.2 | | | 3459 | | | 6699 | | 19.2 | |
| GF + Arch. | 5 | Porvoo | | 17.3 | | 63.6 | | | 3439 | | | 6682 | | 5439.4 | |
| GF + Arch. | 6 | Vuosaari | | 17.3 | | 60.3 | | | 3399 | | | 6679 | | 9945.5 | |
| GF + Arch. | 7 | Porkkala | | 17.1 | | 59.5 | | | 3357 | | | 6661 | | 24.6 | |
| GF + Arch. | 8 | Snappertuna | | 17.1 | | 59.6 | | | 3315 | | | 6652 | | 157.9 | |
| GF + Arch. | 9 | Hanko | | 17.2 | | 54.3 | | | 3273 | | | 6644 | | 1940.9 | |
| GF + Arch. | 10 | Förby | | 17.3 | | 62.4 | | | 3270 | | | 6669 | | 6552.6 | |
| GF + Arch. | 11 | Karuna | | 17.2 | | 72.8 | | | 3256 | | | 6694 | | 2953.4 | |
| GF + Arch. | 12 | Rymättylä | | 17.1 | | 73.1 | | | 3221 | | | 6716 | | 2227.6 | |
| GF + Arch. | 13 | Kustavi | | 16.7 | | 53.5 | | | 3190 | | | 6728 | | 0.0 | |
| Bothnian Sea | 14 | Uusikaupunki | | 16.6 | | 59.9 | | | 3193 | | | 6760 | | 3953.1 | |
| Bothnian Sea | 15 | Rauma | | 16.5 | | 63.3 | | | 3202 | | | 6793 | | 1617.3 | |
| Bothnian Sea | 16 | Luvia | | 16.4 | | 59.5 | | | 3209 | | | 6816 | | 5671.7 | |
| Bothnian Sea | 17 | Reposaari | | 16.2 | | 58.9 | | | 3206 | | | 6846 | | 5478 | |
| Bothnian Sea | 18 | Merikarvia | | 16.2 | | 64.3 | | | 3204 | | | 6884 | | 69020.7 | |
| Bothnian Sea | 19 | Kristiinankaup. | | 16.1 | | 61.3 | | | 3208 | | | 6919 | | 5188.8 | |
| Bothnian Sea | 20 | Närpiö | | 15.8 | | 56.2 | | | 3198 | | | 6944 | | 2308.5 | |
| Bothnian Sea | 21 | Korsnäs | | 16 | | 64.3 | | | 3201 | | | 6976 | | 309986 | |
| Bothnian Sea | 22 | Långskäret | | 16.2 | | 58.8 | | | 3219 | | | 7003 | | 1386.2 | |
| Bothnian Sea | 23 | Iskmo | | 16.2 | | 59.1 | | | 3223 | | | 7023 | | 4486.0 | |
| Bothnian Bay | 24 | Oravainen | | 16.1 | | 65.4 | | | 3268 | | | 7031 | | 9945.0 | |
| Bothnian Bay | 25 | Uusikaarlepyy | | 15.9 | | 65.9 | | | 3274 | | | 7054 | | 7664.2 | |
| Bothnian Bay | 26 | Luoto | | 15.6 | | 64.2 | | | 3289 | | | 7081 | | 2277.6 | |
| Bothnian Bay | 27 | Kokkola | | 15.7 | | 70.1 | | | 3324 | | | 7103 | | 67027.4 | |
| Bothnian Bay | 28 | Kalajoki | | 15.4 | | 64.9 | | | 3340 | | | 7129 | | 54092.3 | |
| Bothnian Bay | 29 | Yppäri/Pyhäjoki | | 15.5 | | 68.8 | | | 3357 | | | 7149 | | 351800 | |
| Bothnian Bay | 30 | Raahe | | 15.7 | | 63.9 | | | 3376 | | | 7177 | | 135.9 | |
| Bothnian Bay | 31 | Siikajoki | | 15.7 | | 57.2 | | | 3396 | | | 7201 | | 145338 | |
| Bothnian Bay | 32 | Oulunsalo | | 16.3 | | 71.4 | | | 3421 | | | 7211 | | 9920.3 | |
| Bothnian Bay | 33 | Haukipudas | | 16.2 | | 68.6 | | | 3421 | | | 7225 | | 2486.8 | |
| Bothnian Bay | 34 | Ii/Ojakylä | | 16 | | 65.7 | | | 3420 | | | 7245 | | 28363.9 | |
| Bothnian Bay | 35 | Ii/Kuivaniemi | | 15.9 | | 68.9 | | | 3413 | | | 7274 | | 31391.7 | |
| Bothnian Bay | 36 | Simo | | 15.9 | | 61.5 | | | 3395 | | | 7284 | | 42378 | |
| Bothnian Bay | 37 | Kemi | | 15.7 | | 60.3 | | | 3388 | | | 7295 | | 10311.3 | |
